# Supplementary material
Source: publisher site journal article supplement (https://www.dovepress.com/article/586181)
Supplement: Supplementary file 1 [file 586181%20Revised%20Table%20S1-S7.docx]

**Table S1. Detailed schedule of the chronic unpredictable stress**

| **Day** | **Week** | | | | |
| --- | --- | --- | --- | --- | --- |
| **Week 1** | **Week 2** | | **Week 3** | **Week 4** |
| Sunday | White noise: 1 h (100 DB)  Overnight stroboscope: 12 h (120 times/min) | Cage tilt: 24 h | | Cage tilt: 24 h | Cage tilt: 24 h |
| Monday | Shock: 30 min (150 times/min) | Shock: 30 min (150 times/min) | Shock: 30 min (150 times/min) | | Cold forced swimming: 5 min |
| Tuesday | Restraint: 1 h  Overnight illumination: 12 h | White noise: 2 h (100 DB)  Overnight stroboscope: 12 h (120 times/min) | | Water depravation: 24 h | Shock: 30 min (150 times/min) |
| Wednesday | Cold forced swimming: 5 min | Restraint: 2 h  Overnight illumination: 12 h | | Tail pinch: 2 min | Soiled cage: 24 h |
| Thursday | Soiled cage: 24 h | Soiled cage: 24 h | | Soiled cage: 24 h | Tail pinch: 2 min |
| Friday | Tail pinch: 2 min | Cold forced swimming: 5 min | | Restraint: 2 h  Overnight illumination: 12 h | Food depravation: 24 h |
| Saturday | Water depravation: 24 h | Food depravation: 24 h | | Food depravation: 24 h | Soiled cage: 24 h |

**Table S2. Detailed protocols for Mouse Behavioral Experiments**

| **Project** | **Specific Methods** |
| --- | --- |
| Forced Swim Test | The animals were placed in an organic glass drum filled with water (temperature: 23 ± 2 °C). For the behavioral despair test, all mice were allowed to swim freely for 6 min, and the duration of immobility in the last 4 min was recorded. For the CUMS model, all mice were forced to swim for 15 min (pre-test), followed by a 5 min session (test) 24 h later. Each animal was judged to be immobile when it stopped struggling, remained floating motionless in water, and only made those movements necessary to keep its head above water. |
| Morris Water Maze | The Morris water maze experiment utilizes a round stainless steel pool with a diameter of 100 cm, evenly divided into four quadrants: east, west, south, and north, with a hidden platform of 10 cm in diameter placed at the center. The pool is filled with water to a level 0.8 cm above the height of the hidden platform, and the water temperature is maintained at 23 ± 1 °C. The experimental environment is kept quiet with fixed visual cues around the maze. To reduce stress responses, the mice are allowed to swim freely for 60 seconds in a platformless maze the day before the experiment begins. During the positioning navigation trials, the mice are placed in the water facing the pool wall from the opposite quadrant of the target quadrant, and the time taken to reach the hidden platform (escape latency) is recorded. If the mice do not find the platform within 60 seconds, the escape latency is recorded as 60 seconds, and the mice are gently guided to the platform, where they stay for 15 seconds to remember the location and surrounding environment. This procedure is repeated five times, and the mice are gently dried with a gauze after each training session. Escape latency and swimming trajectories are recorded using an automated monitoring system, and data are analyzed using repeated measures ANOVA. On the sixth day, a space exploration experiment is conducted where the hidden platform is removed. The mice are placed in the maze from the opposite quadrant facing the pool wall and allowed to swim freely for 60 seconds. The time taken to first reach the virtual platform, the frequency of crossing the virtual platform, the duration in the virtual platform quadrant, and swimming trajectories are recorded, with data analyzed using one-way ANOVA. |
| Open Field Test | The apparatus used in the open-field test was an arena (diameter 122 cm, height 45 cm) with the base equally divided into 16 sectors. Mice were placed in the center of the arena 24 h after the last drug treatment and the number of crossings and rearings was recorded simultaneously within 5 min. |
| Elevated Plus Maze | The elevated plus maze test is routinely used for assessing anxiety-like behavior. All parts of the apparatus were made of dark polyvinyl plastic. The open and closed arms of the maze were 50 cm above the floor, 50 cm long and 10 cm wide. Each session lasted 5 min and started by placing the rat in the central intersection area facing the open arm of the maze. Selected parameters were determined: number of entries to open and closed arms of the maze and time spent in intersection zone. |

**Table S3. Detailed protocols for Mouse Histological Staining**

| **Project** | **Specific Methods** |
| --- | --- |
| **Immunostaining** | Paraffin-embedded tissue sections (6 μm thick) were sequentially immersed in xylene, anhydrous ethanol, 85% ethanol, 75% ethanol, and distilled water for deparaffinization and rehydration. The tissue sections were then placed in EDTA antigen retrieval buffer (pH 9.0) and heated in a microwave for antigen retrieval, taking care to prevent the buffer from evaporating during the heating process. After this step, the sections were washed with PBS.Next, the surface of the sections was blocked with a BSA solution (Solarbio, China) to prevent antibody loss and preserve the antigenicity of the tissue. Following this, the excess blocking solution was removed, and the previously prepared primary antibody diluted in PBS (Solarbio, China) was applied. The sections were then laid flat in a humidified chamber and incubated overnight at 4°C to avoid antibody evaporation.After incubation with the primary antibody, the sections were washed again with PBS and treated with the corresponding secondary antibody (Solarbio, China), incubating in the dark at room temperature. Subsequently, DAPI was used to counterstain the cell nuclei while protecting from light exposure. Finally, the sections were mounted using an anti-fade mounting medium.  Imaging was performed using a Nikon inverted fluorescence microscope (Nikon, Japan), ensuring the use of appropriate excitation and emission wavelengths to capture the immunofluorescent images. |
| **H&E staining** | For H&E staining (Solarbio, China), paraffin-embedded hippocampal tissue sections were dewaxed, and 4-μm thick sections were stained with hematoxylin solution for 6 minutes, followed by a 30-second differentiation step and rinsing with distilled water. Subsequently, the sections were counterstained with eosin solution for 2 min. Sections were dehydrated using varying concentrations of alcohol, cleared in xylene, and sealed with neutral glue. Finally, imaging was performed using a VS200 slide scanning system (Olympus, Japan). |
| **Nissl staining** | Depression is linked to alterations in neuroplasticity within specific brain regions, notably the hippocampus. The sensitivity of Nissl bodies to toluidine blue staining serves as an indicator of Nissl body synthesis and neuronal viability. To evaluate neurogenesis, brain sections were  stained with toluidine blue O. Initially, the sections were treated with xylene for deparaffinization and subsequently rehydrated through a series of graded alcohol solutions and distilled water. The slices were then stained with toluidine blue (Servicebio, China) for 10 min, briefly rinsed in distilled water, dried in a 60℃environment, cleared with xylene, and finally mounted with neutral gum. |

Genes: Genes from our list belonging to the pathway.

List Total: Total number of genes submitted for analysis.

Pop Hits / Pop Total: Number of genes in the pathway out of all genes in the reference database.

Fold Enrichment: The magnitude of enrichment for our gene list in this pathway.

Bonferroni, Benjamini, *FDR*: *P*-values corrected for multiple testing to reduce false positives.

**Table S4.** **Targets of active compounds in Cistanche deserticola**

| **Mol ID** | **Molecule name** | **Target name** |
| --- | --- | --- |
| MOL005320 | arachidonate | Prostaglandin G/H synthase 1 |
| MOL005320 | arachidonate | Prostaglandin G/H synthase 2 |
| MOL005320 | arachidonate | Retinoic acid receptor RXR-gamma |
| MOL005320 | arachidonate | Nuclear receptor coactivator 2 |
| MOL000358 | beta-sitosterol | Progesterone receptor |
| MOL000358 | beta-sitosterol | Nuclear receptor coactivator 2 |
| MOL000358 | beta-sitosterol | Prostaglandin G/H synthase 1 |
| MOL000358 | beta-sitosterol | Prostaglandin G/H synthase 2 |
| MOL000358 | beta-sitosterol | Heat shock protein HSP 90 |
| MOL000358 | beta-sitosterol | Phosphatidylinositol-4,5-bisphosphate 3-kinase catalytic subunit, gamma isoform |
| MOL000358 | beta-sitosterol | Potassium voltage-gated channel subfamily H member 2 |
| MOL000358 | beta-sitosterol | mRNA of PKA Catalytic Subunit C-alpha |
| MOL000358 | beta-sitosterol | Dopamine D1 receptor |
| MOL000358 | beta-sitosterol | Muscarinic acetylcholine receptor M3 |
| MOL000358 | beta-sitosterol | Muscarinic acetylcholine receptor M1 |
| MOL000358 | beta-sitosterol | Sodium channel protein type 5 subunit alpha |
| MOL000358 | beta-sitosterol | Gamma-aminobutyric-acid receptor alpha-2 subunit |
| MOL000358 | beta-sitosterol | Muscarinic acetylcholine receptor M4 |
| MOL000358 | beta-sitosterol | CGMP-inhibited 3',5'-cyclic phosphodiesterase A |
| MOL000358 | beta-sitosterol | 5-hydroxytryptamine 2A receptor |
| MOL000358 | beta-sitosterol | Gamma-aminobutyric-acid receptor alpha-5 subunit |
| MOL000358 | beta-sitosterol | Alpha-1A adrenergic receptor |
| MOL000358 | beta-sitosterol | Gamma-aminobutyric-acid receptor alpha-3 subunit |
| MOL000358 | beta-sitosterol | Muscarinic acetylcholine receptor M2 |
| MOL000358 | beta-sitosterol | Alpha-1B adrenergic receptor |
| MOL000358 | beta-sitosterol | Beta-2 adrenergic receptor |
| MOL000358 | beta-sitosterol | Neuronal acetylcholine receptor subunit alpha-2 |
| MOL000358 | beta-sitosterol | Sodium-dependent serotonin transporter |
| MOL000358 | beta-sitosterol | Mu-type opioid receptor |
| MOL000358 | beta-sitosterol | Gamma-aminobutyric acid receptor subunit alpha-1 |
| MOL000358 | beta-sitosterol | Neuronal acetylcholine receptor protein, alpha-7 chain |
| MOL000358 | beta-sitosterol | Cytochrome P450-cam |
| MOL000358 | beta-sitosterol | Apoptosis regulator Bcl-2 |
| MOL000358 | beta-sitosterol | Apoptosis regulator BAX |
| MOL000358 | beta-sitosterol | Caspase-9 |
| MOL000358 | beta-sitosterol | Transcription factor AP-1 |
| MOL000358 | beta-sitosterol | Caspase-3 |
| MOL000358 | beta-sitosterol | Caspase-8 |
| MOL000358 | beta-sitosterol | Protein kinase C alpha type |
| MOL000358 | beta-sitosterol | Transforming growth factor beta-1 |
| MOL000358 | beta-sitosterol | Serum paraoxonase/arylesterase 1 |
| MOL000358 | beta-sitosterol | Microtubule-associated protein 2 |
| MOL005384 | suchilactone | Potassium voltage-gated channel subfamily H member 2 |
| MOL005384 | suchilactone | Sodium channel protein type 5 subunit alpha |
| MOL005384 | suchilactone | Coagulation factor Xa |
| MOL005384 | suchilactone | Prostaglandin G/H synthase 2 |
| MOL005384 | suchilactone | Coagulation factor VII |
| MOL005384 | suchilactone | mRNA of Protein-tyrosine phosphatase, non-receptor type 1 |
| MOL005384 | suchilactone | Beta-2 adrenergic receptor |
| MOL005384 | suchilactone | Heat shock protein HSP 90 |
| MOL005384 | suchilactone | Nuclear receptor coactivator 1 |
| MOL005384 | suchilactone | Calcium-activated potassium channel subunit alpha 1 |
| MOL005384 | suchilactone | Calmodulin |
| MOL005384 | suchilactone | Prostaglandin G/H synthase 1 |
| MOL005384 | suchilactone | Retinoic acid receptor RXR-alpha |
| MOL005384 | suchilactone | CGMP-inhibited 3',5'-cyclic phosphodiesterase A |
| MOL005384 | suchilactone | Alpha-1D adrenergic receptor |
| MOL005384 | suchilactone | mRNA of PKA Catalytic Subunit C-alpha |
| MOL007563 | Yangambin | Potassium voltage-gated channel subfamily H member 2 |
| MOL007563 | Yangambin | Sodium channel protein type 5 subunit alpha |
| MOL007563 | Yangambin | Coagulation factor Xa |
| MOL007563 | Yangambin | Prostaglandin G/H synthase 2 |
| MOL007563 | Yangambin | DNA topoisomerase II |
| MOL007563 | Yangambin | Voltage-dependent L-type calcium channel subunit alpha-1S |
| MOL007563 | Yangambin | Nuclear receptor coactivator 2 |
| MOL007563 | Yangambin | Calmodulin |
| MOL007563 | Yangambin | Calcium-activated potassium channel subunit alpha 1 |
| MOL008871 | Marckine | Prostaglandin G/H synthase 2 |
| MOL008871 | Marckine | Calmodulin |
| MOL000098 | quercetin | Prostaglandin G/H synthase 1 |
| MOL000098 | quercetin | Androgen receptor |
| MOL000098 | quercetin | Peroxisome proliferator activated receptor gamma |
| MOL000098 | quercetin | Prostaglandin G/H synthase 2 |
| MOL000098 | quercetin | Heat shock protein HSP 90 |
| MOL000098 | quercetin | Phosphatidylinositol-4,5-bisphosphate 3-kinase catalytic subunit, gamma isoform |
| MOL000098 | quercetin | Nuclear receptor coactivator 2 |
| MOL000098 | quercetin | Dipeptidyl peptidase IV |
| MOL000098 | quercetin | Aldose reductase |
| MOL000098 | quercetin | Trypsin-1 |
| MOL000098 | quercetin | DNA topoisomerase II |
| MOL000098 | quercetin | Thrombin |
| MOL000098 | quercetin | Potassium voltage-gated channel subfamily H member 2 |
| MOL008871 | Marckine | Prostaglandin G/H synthase 2 |
| MOL008871 | Marckine | Calmodulin |
| MOL000098 | quercetin | Prostaglandin G/H synthase 1 |
| MOL000098 | quercetin | Androgen receptor |
| MOL000098 | quercetin | Peroxisome proliferator activated receptor gamma |
| MOL000098 | quercetin | Prostaglandin G/H synthase 2 |
| MOL000098 | quercetin | Heat shock protein HSP 90 |
| MOL000098 | quercetin | Phosphatidylinositol-4,5-bisphosphate 3-kinase catalytic subunit, gamma isoform |
| MOL000098 | quercetin | Nuclear receptor coactivator 2 |
| MOL000098 | quercetin | Dipeptidyl peptidase IV |
| MOL000098 | quercetin | Aldose reductase |
| MOL000098 | quercetin | Trypsin-1 |
| MOL000098 | quercetin | DNA topoisomerase II |
| MOL000098 | quercetin | Thrombin |
| MOL000098 | quercetin | Potassium voltage-gated channel subfamily H member 2 |
| MOL000098 | quercetin | G1/S-specific cyclin-D1 |
| MOL000098 | quercetin | Apoptosis regulator Bcl-2 |
| MOL000098 | quercetin | Bcl-2-like protein 1 |
| MOL000098 | quercetin | Proto-oncogene c-Fos |
| MOL000098 | quercetin | Cyclin-dependent kinase inhibitor 1 |
| MOL000098 | quercetin | Eukaryotic translation initiation factor 6 |
| MOL000098 | quercetin | Apoptosis regulator BAX |
| MOL000098 | quercetin | Caspase-9 |
| MOL000098 | quercetin | Urokinase-type plasminogen activator |
| MOL000098 | quercetin | 72 kDa type IV collagenase |
| MOL000098 | quercetin | Matrix metalloproteinase-9 |
| MOL000098 | quercetin | Mitogen-activated protein kinase 1 |
| MOL000098 | quercetin | Interleukin-10 |
| MOL000098 | quercetin | Pro-epidermal growth factor |
| MOL000098 | quercetin | Retinoblastoma-associated protein |
| MOL000098 | quercetin | Tumor necrosis factor |
| MOL000098 | quercetin | Transcription factor AP-1 |
| MOL000098 | quercetin | Interleukin-6 |
| MOL000098 | quercetin | Cyclin-dependent kinase inhibitor 2A, isoforms 1/2/3 |
| MOL000098 | quercetin | Activator of 90 kDa heat shock protein ATPase homolog 1 |
| MOL000098 | quercetin | Caspase-3 |
| MOL000098 | quercetin | Cellular tumor antigen p53 |
| MOL000098 | quercetin | ETS domain-containing protein Elk-1 |
| MOL000098 | quercetin | NF-kappa-B inhibitor alpha |
| MOL000098 | quercetin | NADPH--cytochrome P450 reductase |
| MOL000098 | quercetin | Ornithine decarboxylase |
| MOL000098 | quercetin | Xanthine dehydrogenase/oxidase |
| MOL000098 | quercetin | Caspase-8 |
| MOL000098 | quercetin | DNA topoisomerase 1 |
| MOL000098 | quercetin | RAF proto-oncogene serine/threonine-protein kinase |
| MOL000098 | quercetin | Superoxide dismutase [Cu-Zn] |
| MOL000098 | quercetin | Protein kinase C alpha type |
| MOL000098 | quercetin | Interstitial collagenase |
| MOL000098 | quercetin | Hypoxia-inducible factor 1-alpha |
| MOL000098 | quercetin | Signal transducer and activator of transcription 1-alpha/beta |
| MOL000098 | quercetin | Protein CBFA2T1 |
| MOL000098 | quercetin | Probable E3 ubiquitin-protein ligase HERC5 |
| MOL000098 | quercetin | Cell division control protein 2 homolog |
| MOL000098 | quercetin | 78 kDa glucose-regulated protein |
| MOL000098 | quercetin | Receptor tyrosine-protein kinase erbB-2 |
| MOL000098 | quercetin | Peroxisome proliferator-activated receptor gamma |
| MOL000098 | quercetin | Acetyl-CoA carboxylase 1 |
| MOL000098 | quercetin | Heme oxygenase 1 |
| MOL000098 | quercetin | Cytochrome P450 3A4 |
| MOL000098 | quercetin | Cytochrome P450 1A2 |
| MOL000098 | quercetin | Caveolin-1 |
| MOL000098 | quercetin | Myc proto-oncogene protein |
| MOL000098 | quercetin | Tissue factor |
| MOL000098 | quercetin | Gap junction alpha-1 protein |
| MOL000098 | quercetin | Cytochrome P450 1A1 |
| MOL000098 | quercetin | Intercellular adhesion molecule 1 |
| MOL000098 | quercetin | Interleukin-1 beta |
| MOL000098 | quercetin | C-C motif chemokine 2 |
| MOL000098 | quercetin | E-selectin |
| MOL000098 | quercetin | Vascular cell adhesion protein 1 |
| MOL000098 | quercetin | Prostaglandin E2 receptor EP3 subtype |
| MOL000098 | quercetin | Interleukin-8 |
| MOL000098 | quercetin | Protein kinase C beta type |
| MOL000098 | quercetin | Baculoviral IAP repeat-containing protein 5 |
| MOL000098 | quercetin | Dual oxidase 2 |
| MOL000098 | quercetin | Nitric oxide synthase, endothelial |
| MOL000098 | quercetin | Heat shock protein beta-1 |
| MOL000098 | quercetin | Transforming growth factor beta-1 |
| MOL000098 | quercetin | Estrogen sulfotransferase |
| MOL000098 | quercetin | Maltase-glucoamylase, intestinal |
| MOL000098 | quercetin | Interleukin-2 |
| MOL000098 | quercetin | Nuclear receptor subfamily 1 group I member 2 |
| MOL000098 | quercetin | Cytochrome P450 1B1 |
| MOL000098 | quercetin | G2/mitotic-specific cyclin-B1 |
| MOL000098 | quercetin | Tissue-type plasminogen activator |
| MOL000098 | quercetin | Thrombomodulin |
| MOL000098 | quercetin | Plasminogen activator inhibitor 1 |
| MOL000098 | quercetin | Collagen alpha-1(I) chain |
| MOL000098 | quercetin | Interferon gamma |
| MOL000098 | quercetin | Arachidonate 5-lipoxygenase |
| MOL000098 | quercetin | Phosphatidylinositol-3,4,5-trisphosphate 3-phosphatase and dual-specificity protein phosphatase PTEN |
| MOL000098 | quercetin | Interleukin-1 alpha |
| MOL000098 | quercetin | Myeloperoxidase |
| MOL000098 | quercetin | DNA topoisomerase 2-alpha |
| MOL000098 | quercetin | Neutrophil cytosol factor 1 |
| MOL000098 | quercetin | ATP-binding cassette sub-family G member 2 |
| MOL000098 | quercetin | Hyaluronan synthase 2 |
| MOL000098 | quercetin | Glutathione S-transferase P |
| MOL000098 | quercetin | Nuclear factor erythroid 2-related factor 2 |
| MOL000098 | quercetin | NAD(P)H dehydrogenase [quinone] 1 |
| MOL000098 | quercetin | Poly [ADP-ribose] polymerase 1 |
| MOL000098 | quercetin | Aryl hydrocarbon receptor |
| MOL000098 | quercetin | 26S proteasome non-ATPase regulatory subunit 3 |
| MOL000098 | quercetin | Solute carrier family 2, facilitated glucose transporter member 4 |
| MOL000098 | quercetin | Collagen alpha-1(III) chain |
| MOL000098 | quercetin | DNA gyrase subunit B |
| MOL000098 | quercetin | C-X-C motif chemokine 11 |
| MOL000098 | quercetin | C-X-C motif chemokine 2 |
| MOL000098 | quercetin | DDB1- and CUL4-associated factor 5 |
| MOL000098 | quercetin | Nuclear receptor subfamily 1 group I member 3 |
| MOL000098 | quercetin | Serine/threonine-protein kinase Chk2 |
| MOL000098 | quercetin | Insulin receptor |
| MOL000098 | quercetin | Claudin-4 |
| MOL000098 | quercetin | Peroxisome proliferator-activated receptor alpha |
| MOL000098 | quercetin | Peroxisome proliferator-activated receptor delta |
| MOL000098 | quercetin | Heat shock factor protein 1 |
| MOL000098 | quercetin | C-reactive protein |
| MOL000098 | quercetin | C-X-C motif chemokine 10 |
| MOL000098 | quercetin | Inhibitor of nuclear factor kappa-B kinase subunit alpha |
| MOL000098 | quercetin | Osteopontin |
| MOL000098 | quercetin | Runt-related transcription factor 2 |
| MOL000098 | quercetin | Ras association domain-containing protein 1 |
| MOL000098 | quercetin | Transcription factor E2F1 |
| MOL000098 | quercetin | Transcription factor E2F2 |
| MOL000098 | quercetin | Prostatic acid phosphatase |
| MOL000098 | quercetin | Cathepsin D |
| MOL000098 | quercetin | Insulin-like growth factor-binding protein 3 |
| MOL000098 | quercetin | Insulin-like growth factor II |
| MOL000098 | quercetin | CD40 ligand |
| MOL000098 | quercetin | Interferon regulatory factor 1 |
| MOL000098 | quercetin | Receptor tyrosine-protein kinase erbB-3 |
| MOL000098 | quercetin | Serum paraoxonase/arylesterase 1 |
| MOL000098 | quercetin | Type I iodothyronine deiodinase |
| MOL000098 | quercetin | Procollagen C-endopeptidase enhancer 1 |
| MOL000098 | quercetin | Puromycin-sensitive aminopeptidase |
| MOL000098 | quercetin | Hexokinase-2 |
| MOL000098 | quercetin | Homeobox protein Nkx-3.1 |
| MOL000098 | quercetin | Ras GTPase-activating protein 1 |
| MOL000098 | quercetin | Peroxidase C1A |
| MOL000098 | quercetin | Glutathione S-transferase Mu 1 |
| MOL000098 | quercetin | Glutathione S-transferase Mu 2 |

**Table S5.** **Depression-related target genes**

| **Disease** | **Disease_id** | **Gene** | **Gene_id** | **UniProt** | **Gene_Full_Name** |
| --- | --- | --- | --- | --- | --- |
| Depressive disorder | C0011581 | SLC6A4 | 6532 | P31645 | solute carrier family 6 member 4 |
| Depressive disorder | C0011581 | FGFR1 | 2260 | P11362 | fibroblast growth factor receptor 1 |
| Depressive disorder | C0011581 | SOD1 | 6647 | P00441 | superoxide dismutase 1 |
| Depressive disorder | C0011581 | TPH2 | 121278 | Q8IWU9 | tryptophan hydroxylase 2 |
| Depressive disorder | C0011581 | CRH | 1392 | P06850 | corticotropin releasing hormone |
| Depressive disorder | C0011581 | DISC1 | 27185 | Q9NRI5 | DISC1 scaffold protein |
| Depressive disorder | C0011581 | NR3C1 | 2908 | P04150 | nuclear receptor subfamily 3 group C member 1 |
| Depressive disorder | C0011581 | IL6 | 3569 | P05231 | interleukin 6 |
| Depressive disorder | C0011581 | KCNK2 | 3776 | O95069 | potassium two pore domain channel subfamily K member 2 |
| Depressive disorder | C0011581 | MTHFR | 4524 | P42898 | methylenetetrahydrofolate reductase |
| Depressive disorder | C0011581 | NPY | 4852 | P01303 | neuropeptide Y |
| Depressive disorder | C0011581 | PTGS2 | 5743 | P35354 | prostaglandin-endoperoxide synthase 2 |
| Depressive disorder | C0011581 | BDNF | 627 | P23560 | brain derived neurotrophic factor |
| Depressive disorder | C0011581 | S100A10 | 6281 | P60903 | S100 calcium binding protein A10 |
| Depressive disorder | C0011581 | POMC | 5443 | P01189 | proopiomelanocortin |
| Depressive disorder | C0011581 | GSK3B | 2932 | P49841 | glycogen synthase kinase 3 beta |
| Depressive disorder | C0011581 | CNR2 | 1269 | P34972 | cannabinoid receptor 2 |
| Depressive disorder | C0011581 | HTR7 | 3363 | P34969 | 5-hydroxytryptamine receptor 7 |
| Depressive disorder | C0011581 | RELN | 5649 | P78509 | reelin |
| Depressive disorder | C0011581 | GLO1 | 2739 | Q04760 | glyoxalase I |
| Depressive disorder | C0011581 | COMT | 1312 | P21964 | catechol-O-methyltransferase |
| Depressive disorder | C0011581 | DRD2 | 1813 | P14416 | dopamine receptor D2 |
| Depressive disorder | C0011581 | HTR2A | 3356 | P28223 | 5-hydroxytryptamine receptor 2A |
| Depressive disorder | C0011581 | SNAP25 | 6616 | P60880 | synaptosome associated protein 25 |
| Depressive disorder | C0011581 | COX2 | 4513 | P00403 | cytochrome c oxidase subunit II |
| Depressive disorder | C0011581 | PON1 | 5444 | P27169 | paraoxonase 1 |
| Depressive disorder | C0011581 | SLC18A2 | 6571 | Q05940 | solute carrier family 18 member A2 |
| Depressive disorder | C0011581 | PER2 | 8864 | O15055 | period circadian regulator 2 |
| Depressive disorder | C0011581 | PSEN1 | 5663 | P49768 | presenilin 1 |
| Depressive disorder | C0011581 | GABRB3 | 2562 | P28472 | gamma-aminobutyric acid type A receptor subunit beta3 |
| Depressive disorder | C0011581 | GRIN2A | 2903 | Q12879 | glutamate ionotropic receptor NMDA type subunit 2A |
| Depressive disorder | C0011581 | PER3 | 8863 | P56645 | period circadian regulator 3 |
| Depressive disorder | C0011581 | HTT | 3064 | P42858 | huntingtin |
| Depressive disorder | C0011581 | WFS1 | 7466 | O76024 | wolframin ER transmembrane glycoprotein |
| Depressive disorder | C0011581 | CNR1 | 1268 | P21554 | cannabinoid receptor 1 |
| Depressive disorder | C0011581 | CREB1 | 1385 | P16220 | cAMP responsive element binding protein 1 |
| Depressive disorder | C0011581 | CRHR1 | 1394 | P34998 | corticotropin releasing hormone receptor 1 |
| Depressive disorder | C0011581 | CYP2D6 | 1565 | P10635 | cytochrome P450 family 2 subfamily D member 6 |
| Depressive disorder | C0011581 | ACE | 1636 | P12821 | angiotensin I converting enzyme |
| Depressive disorder | C0011581 | DRD4 | 1815 | P21917 | dopamine receptor D4 |
| Depressive disorder | C0011581 | DUSP6 | 1848 | Q16828 | dual specificity phosphatase 6 |
| Depressive disorder | C0011581 | ESR1 | 2099 | P03372 | estrogen receptor 1 |
| Depressive disorder | C0011581 | FKBP5 | 2289 | Q13451 | FKBP prolyl isomerase 5 |
| Depressive disorder | C0011581 | GAD1 | 2571 | Q99259 | glutamate decarboxylase 1 |
| Depressive disorder | C0011581 | GRN | 2896 | P28799 | granulin precursor |
| Depressive disorder | C0011581 | GRIN2B | 2904 | Q13224 | glutamate ionotropic receptor NMDA type subunit 2B |
| Depressive disorder | C0011581 | HCRT | 3060 | O43612 | hypocretin neuropeptide precursor |
| Depressive disorder | C0011581 | HTR1A | 3350 | P08908 | 5-hydroxytryptamine receptor 1A |
| Depressive disorder | C0011581 | HTR2C | 3358 | P28335 | 5-hydroxytryptamine receptor 2C |
| Depressive disorder | C0011581 | IGF1 | 3479 | P05019 | insulin like growth factor 1 |
| Depressive disorder | C0011581 | IL1B | 3553 | P01584 | interleukin 1 beta |
| Depressive disorder | C0011581 | IL18 | 3606 | Q14116 | interleukin 18 |
| Depressive disorder | C0011581 | IDO1 | 3620 | P14902 | indoleamine 2,3-dioxygenase 1 |
| Depressive disorder | C0011581 | AR | 367 | P10275 | androgen receptor |
| Depressive disorder | C0011581 | LEP | 3952 | P41159 | leptin |
| Depressive disorder | C0011581 | MAOA | 4128 | P21397 | monoamine oxidase A |
| Depressive disorder | C0011581 | NR3C2 | 4306 | P08235 | nuclear receptor subfamily 3 group C member 2 |
| Depressive disorder | C0011581 | ATP1A3 | 478 | P13637 | ATPase Na+/K+ transporting subunit alpha 3 |
| Depressive disorder | C0011581 | NTRK2 | 4915 | Q16620 | neurotrophic receptor tyrosine kinase 2 |
| Depressive disorder | C0011581 | OPRK1 | 4986 | P41145 | opioid receptor kappa 1 |
| Depressive disorder | C0011581 | OXTR | 5021 | P30559 | oxytocin receptor |
| Depressive disorder | C0011581 | P2RX7 | 5027 | Q99572 | purinergic receptor P2X 7 |
| Depressive disorder | C0011581 | GAL | 51083 | P22466 | galanin and GMAP prepropeptide |
| Depressive disorder | C0011581 | ABCB1 | 5243 | P08183 | ATP binding cassette subfamily B member 1 |
| Depressive disorder | C0011581 | PRNP | 5621 | F7VJQ1;P04156 | prion protein |
| Depressive disorder | C0011581 | S100B | 6285 | P04271 | S100 calcium binding protein B |
| Depressive disorder | C0011581 | SLC6A2 | 6530 | P23975 | solute carrier family 6 member 2 |
| Depressive disorder | C0011581 | SLC6A3 | 6531 | Q01959 | solute carrier family 6 member 3 |
| Depressive disorder | C0011581 | TAC1 | 6863 | P20366 | tachykinin precursor 1 |
| Depressive disorder | C0011581 | TNF | 7124 | P01375 | tumor necrosis factor |
| Depressive disorder | C0011581 | TPH1 | 7166 | P17752 | tryptophan hydroxylase 1 |
| Depressive disorder | C0011581 | VEGFA | 7422 | P15692 | vascular endothelial growth factor A |
| Depressive disorder | C0011581 | FGF17 | 8822 | O60258 | fibroblast growth factor 17 |
| Depressive disorder | C0011581 | SGCE | 8910 | O43556 | sarcoglycan epsilon |
| Depressive disorder | C0011581 | ARTN | 9048 | Q5T4W7 | artemin |
| Depressive disorder | C0011581 | IL1A | 3552 | P01583 | interleukin 1 alpha |
| Depressive disorder | C0011581 | REN | 5972 | P00797 | renin |
| Depressive disorder | C0011581 | CLOCK | 9575 | O15516 | clock circadian regulator |
| Depressive disorder | C0011581 | CYP2C19 | 1557 | P33261 | cytochrome P450 family 2 subfamily C member 19 |
| Depressive disorder | C0011581 | FGF2 | 2247 | P09038 | fibroblast growth factor 2 |
| Depressive disorder | C0011581 | GRIA1 | 2890 | P42261 | glutamate ionotropic receptor AMPA type subunit 1 |
| Depressive disorder | C0011581 | CXCL8 | 3576 | P10145 | C-X-C motif chemokine ligand 8 |
| Depressive disorder | C0011581 | NGF | 4803 | P01138 | nerve growth factor |
| Depressive disorder | C0011581 | NOS1 | 4842 | P29475 | nitric oxide synthase 1 |
| Depressive disorder | C0011581 | CACNA1C | 775 | Q13936 | calcium voltage-gated channel subunit alpha1 C |
| Depressive disorder | C0011581 | ALB | 213 | P02768 | albumin |
| Depressive disorder | C0011581 | PCLO | 27445 | Q9Y6V0 | piccolo presynaptic cytomatrix protein |
| Depressive disorder | C0011581 | PDE4A | 5141 | P27815 | phosphodiesterase 4A |
| Depressive disorder | C0011581 | BICC1 | 80114 | Q9H694 | BicC family RNA binding protein 1 |
| Depressive disorder | C0011581 | DRD3 | 1814 | P35462 | dopamine receptor D3 |
| Depressive disorder | C0011581 | AKT1 | 207 | P31749 | AKT serine/threonine kinase 1 |
| Depressive disorder | C0011581 | GABPA | 2551 | Q06546 | GA binding protein transcription factor subunit alpha |
| Depressive disorder | C0011581 | GFAP | 2670 | P14136 | glial fibrillary acidic protein |
| Depressive disorder | C0011581 | GNB3 | 2784 | P16520 | G protein subunit beta 3 |
| Depressive disorder | C0011581 | HP | 3240 | P00738 | haptoglobin |
| Depressive disorder | C0011581 | HTR1B | 3351 | P28222 | 5-hydroxytryptamine receptor 1B |
| Depressive disorder | C0011581 | ARNTL | 406 | O00327 | aryl hydrocarbon receptor nuclear translocator like |
| Depressive disorder | C0011581 | NOS2 | 4843 | P35228 | nitric oxide synthase 2 |
| Depressive disorder | C0011581 | TNFRSF1A | 7132 | P19438 | TNF receptor superfamily member 1A |
| Depressive disorder | C0011581 | HTR3A | 3359 | P46098 | 5-hydroxytryptamine receptor 3A |
| Depressive disorder | C0011581 | MAOB | 4129 | P27338 | monoamine oxidase B |
| Depressive disorder | C0011581 | NOS3 | 4846 | P29474 | nitric oxide synthase 3 |
| Depressive disorder | C0011581 | PDE4B | 5142 | Q07343 | phosphodiesterase 4B |
| Depressive disorder | C0011581 | MAPK3 | 5595 | P27361 | mitogen-activated protein kinase 3 |
| Depressive disorder | C0011581 | BRCA1 | 672 | P38398 | BRCA1 DNA repair associated |
| Depressive disorder | C0011581 | FTO | 79068 | Q9C0B1 | FTO alpha-ketoglutarate dependent dioxygenase |
| Depressive disorder | C0011581 | CHRM2 | 1129 | P08172 | cholinergic receptor muscarinic 2 |
| Depressive disorder | C0011581 | CHRNA4 | 1137 | P43681 | cholinergic receptor nicotinic alpha 4 subunit |
| Depressive disorder | C0011581 | DBH | 1621 | P09172 | dopamine beta-hydroxylase |
| Depressive disorder | C0011581 | DRD1 | 1812 | P21728 | dopamine receptor D1 |
| Depressive disorder | C0011581 | RORA | 6095 | P35398 | RAR related orphan receptor A |
| Depressive disorder | C0011581 | STAT3 | 6774 | P40763 | signal transducer and activator of transcription 3 |
| Depressive disorder | C0011581 | TGFB1 | 7040 | P01137 | transforming growth factor beta 1 |
| Depressive disorder | C0011581 | TNFRSF1B | 7133 | P20333 | TNF receptor superfamily member 1B |
| Depressive disorder | C0011581 | VGF | 7425 | O15240 | VGF nerve growth factor inducible |
| Depressive disorder | C0011581 | HOMER1 | 9456 | Q86YM7 | homer scaffold protein 1 |
| Depressive disorder | C0011581 | CARTPT | 9607 | Q16568 | CART prepropeptide |
| Depressive disorder | C0011581 | ADCY7 | 113 | P51828 | adenylate cyclase 7 |
| Depressive disorder | C0011581 | ADORA2A | 135 | P29274 | adenosine A2a receptor |
| Depressive disorder | C0011581 | CRY1 | 1407 | Q16526 | cryptochrome circadian regulator 1 |
| Depressive disorder | C0011581 | CRY2 | 1408 | Q49AN0 | cryptochrome circadian regulator 2 |
| Depressive disorder | C0011581 | ADRA2A | 150 | P08913 | adrenoceptor alpha 2A |
| Depressive disorder | C0011581 | DPYSL2 | 1808 | Q16555 | dihydropyrimidinase like 2 |
| Depressive disorder | C0011581 | AGT | 183 | P01019 | angiotensinogen |
| Depressive disorder | C0011581 | DUSP1 | 1843 | P28562 | dual specificity phosphatase 1 |
| Depressive disorder | C0011581 | GAP43 | 2596 | P17677 | growth associated protein 43 |
| Depressive disorder | C0011581 | MCHR1 | 2847 | Q99705 | melanin concentrating hormone receptor 1 |
| Depressive disorder | C0011581 | GRM7 | 2917 | Q14831 | glutamate metabotropic receptor 7 |
| Depressive disorder | C0011581 | NRG1 | 3084 | Q02297 | neuregulin 1 |
| Depressive disorder | C0011581 | HSD11B1 | 3290 | P28845 | hydroxysteroid 11-beta dehydrogenase 1 |
| Depressive disorder | C0011581 | HTR4 | 3360 | Q13639 | 5-hydroxytryptamine receptor 4 |
| Depressive disorder | C0011581 | APP | 351 | P05067 | amyloid beta precursor protein |
| Depressive disorder | C0011581 | APRT | 353 | P07741 | adenine phosphoribosyltransferase |
| Depressive disorder | C0011581 | ATXN3 | 4287 | P54252 | ataxin 3 |
| Depressive disorder | C0011581 | MS | 4397 |  | multiple sclerosis |
| Depressive disorder | C0011581 | NCAM1 | 4684 | P13591 | neural cell adhesion molecule 1 |
| Depressive disorder | C0011581 | OPRM1 | 4988 | P35372 | opioid receptor mu 1 |
| Depressive disorder | C0011581 | PDYN | 5173 | P01213 | prodynorphin |
| Depressive disorder | C0011581 | BCL2 | 596 | P10415 | BCL2 apoptosis regulator |
| Depressive disorder | C0011581 | SAT1 | 6303 | P21673 | spermidine/spermine N1-acetyltransferase 1 |
| Depressive disorder | C0011581 | SLC1A2 | 6506 | P43004 | solute carrier family 1 member 2 |
| Depressive disorder | C0011581 | TRH | 7200 | P20396 | thyrotropin releasing hormone |
| Depressive disorder | C0011581 | DTNBP1 | 84062 | Q96EV8 | dystrobrevin binding protein 1 |
| Depressive disorder | C0011581 | CDKN2A | 1029 | P42771;Q8N726 | cyclin dependent kinase inhibitor 2A |
| Depressive disorder | C0011581 | CHAT | 1103 | P28329 | choline O-acetyltransferase |
| Depressive disorder | C0011581 | ADCY5 | 111 | O95622 | adenylate cyclase 5 |
| Depressive disorder | C0011581 | CNTF | 1270 | P26441 | ciliary neurotrophic factor |
| Depressive disorder | C0011581 | CRHBP | 1393 | P24387 | corticotropin releasing hormone binding protein |
| Depressive disorder | C0011581 | CRHR2 | 1395 | Q13324 | corticotropin releasing hormone receptor 2 |
| Depressive disorder | C0011581 | DCANP1 | 140947 | Q8TF63 | dendritic cell associated nuclear protein |
| Depressive disorder | C0011581 | FOS | 2353 | P01100 | Fos proto-oncogene, AP-1 transcription factor subunit |
| Depressive disorder | C0011581 | ANKK1 | 255239 | Q8NFD2 | ankyrin repeat and kinase domain containing 1 |
| Depressive disorder | C0011581 | DAOA | 267012 | P59103 | D-amino acid oxidase activator |
| Depressive disorder | C0011581 | GH1 | 2688 | P01241 | growth hormone 1 |
| Depressive disorder | C0011581 | GPX1 | 2876 | P07203 | glutathione peroxidase 1 |
| Depressive disorder | C0011581 | GRIA3 | 2892 | P42263 | glutamate ionotropic receptor AMPA type subunit 3 |
| Depressive disorder | C0011581 | GSTM1 | 2944 | P09488 | glutathione S-transferase mu 1 |
| Depressive disorder | C0011581 | GTS | 2973 |  | Gilles de la Tourette syndrome |
| Depressive disorder | C0011581 | IFNA2 | 3440 | P01563 | interferon alpha 2 |
| Depressive disorder | C0011581 | HCN1 | 348980 | O60741 | hyperpolarization activated cyclic nucleotide gated potassium channel 1 |
| Depressive disorder | C0011581 | STMN1 | 3925 | P16949 | stathmin 1 |
| Depressive disorder | C0011581 | MTR | 4548 | Q99707 | 5-methyltetrahydrofolate-homocysteine methyltransferase |
| Depressive disorder | C0011581 | NGFR | 4804 | P08138 | nerve growth factor receptor |
| Depressive disorder | C0011581 | PDE1B | 5153 | Q01064 | phosphodiesterase 1B |
| Depressive disorder | C0011581 | PMCH | 5367 | P20382 | pro-melanin concentrating hormone |
| Depressive disorder | C0011581 | RAC1 | 5879 | P63000 | Rac family small GTPase 1 |
| Depressive disorder | C0011581 | NPS | 594857 | P0C0P6 | neuropeptide S |
| Depressive disorder | C0011581 | SLC18A1 | 6570 | P54219 | solute carrier family 18 member A1 |
| Depressive disorder | C0011581 | SOD2 | 6648 | P04179 | superoxide dismutase 2 |
| Depressive disorder | C0011581 | TACR1 | 6869 | P25103 | tachykinin receptor 1 |
| Depressive disorder | C0011581 | TH | 7054 | P07101 | tyrosine hydroxylase |
| Depressive disorder | C0011581 | TTR | 7276 | P02766 | transthyretin |
| Depressive disorder | C0011581 | UCN | 7349 | P55089 | urocortin |
| Depressive disorder | C0011581 | CAMK2A | 815 | Q9UQM7 | calcium/calmodulin dependent protein kinase II alpha |
| Depressive disorder | C0011581 | GALR2 | 8811 | O43603 | galanin receptor 2 |
| Depressive disorder | C0011581 | TIMELESS | 8914 | Q9UNS1 | timeless circadian regulator |
| Depressive disorder | C0011581 | NRXN1 | 9378 | P58400;Q9ULB1 | neurexin 1 |
| Depressive disorder | C0011581 | NR1D1 | 9572 | P20393 | nuclear receptor subfamily 1 group D member 1 |
| Depressive disorder | C0011581 | HDAC9 | 9734 | Q9UKV0 | histone deacetylase 9 |
| Depressive disorder | C0011581 | MED12 | 9968 | Q93074 | mediator complex subunit 12 |
| Depressive disorder | C0011581 | HDAC6 | 10013 | Q9UBN7 | histone deacetylase 6 |
| Depressive disorder | C0011581 | CDH13 | 1012 | P55290 | cadherin 13 |
| Depressive disorder | C0011581 | DEAF1 | 10522 | O75398 | DEAF1 transcription factor |
| Depressive disorder | C0011581 | CPLX2 | 10814 | Q6PUV4 | complexin 2 |
| Depressive disorder | C0011581 | CPLX1 | 10815 | O14810 | complexin 1 |
| Depressive disorder | C0011581 | ADCY8 | 114 | P40145 | adenylate cyclase 8 |
| Depressive disorder | C0011581 | ADCYAP1 | 116 | P18509 | adenylate cyclase activating polypeptide 1 |
| Depressive disorder | C0011581 | ADCYAP1R1 | 117 | P41586 | ADCYAP receptor type I |
| Depressive disorder | C0011581 | CMKLR1 | 1240 | Q99788 | chemerin chemokine-like receptor 1 |
| Depressive disorder | C0011581 | CSF3 | 1440 | P09919 | colony stimulating factor 3 |
| Depressive disorder | C0011581 | ADRB1 | 153 | P08588 | adrenoceptor beta 1 |
| Depressive disorder | C0011581 | GRK2 | 156 | P25098 | G protein-coupled receptor kinase 2 |
| Depressive disorder | C0011581 | DLG4 | 1742 | P78352 | discs large MAGUK scaffold protein 4 |
| Depressive disorder | C0011581 | DPP4 | 1803 | P27487 | dipeptidyl peptidase 4 |
| Depressive disorder | C0011581 | EGR3 | 1960 | Q06889 | early growth response 3 |
| Depressive disorder | C0011581 | ACSL4 | 2182 | O60488 | acyl-CoA synthetase long chain family member 4 |
| Depressive disorder | C0011581 | WWC1 | 23286 | Q8IX03 | WW and C2 domain containing 1 |
| Depressive disorder | C0011581 | FOLH1 | 2346 | Q04609 | folate hydrolase 1 |
| Depressive disorder | C0011581 | GABRA6 | 2559 | Q16445 | gamma-aminobutyric acid type A receptor subunit alpha6 |
| Depressive disorder | C0011581 | AGO1 | 26523 | Q9UL18 | argonaute RISC component 1 |
| Depressive disorder | C0011581 | GLUL | 2752 | P15104 | glutamate-ammonia ligase |
| Depressive disorder | C0011581 | DAOA-AS1 | 282706 |  | DAOA antisense RNA 1 |
| Depressive disorder | C0011581 | GRIK3 | 2899 | Q13003 | glutamate ionotropic receptor kainate type subunit 3 |
| Depressive disorder | C0011581 | GYPE | 2996 | P15421 | glycophorin E (MNS blood group) |
| Depressive disorder | C0011581 | TAAR6 | 319100 | Q96RI8 | trace amine associated receptor 6 |
| Depressive disorder | C0011581 | MMAB | 326625 | Q96EY8 | metabolism of cobalamin associated B |
| Depressive disorder | C0011581 | HTR1D | 3352 | P28221 | 5-hydroxytryptamine receptor 1D |
| Depressive disorder | C0011581 | IL6R | 3570 | P08887 | interleukin 6 receptor |
| Depressive disorder | C0011581 | AQP4 | 361 | P55087 | aquaporin 4 |
| Depressive disorder | C0011581 | KCNJ6 | 3763 | P48051 | potassium inwardly rectifying channel subfamily J member 6 |
| Depressive disorder | C0011581 | NPSR1 | 387129 | Q6W5P4 | neuropeptide S receptor 1 |
| Depressive disorder | C0011581 | LIF | 3976 | P15018 | LIF interleukin 6 family cytokine |
| Depressive disorder | C0011581 | LTA4H | 4048 | P09960 | leukotriene A4 hydrolase |
| Depressive disorder | C0011581 | M6PR | 4074 | P20645 | mannose-6-phosphate receptor, cation dependent |
| Depressive disorder | C0011581 | MC1R | 4157 | Q01726 | melanocortin 1 receptor |
| Depressive disorder | C0011581 | MC4R | 4160 | P32245 | melanocortin 4 receptor |
| Depressive disorder | C0011581 | MIF | 4282 | P14174 | macrophage migration inhibitory factor |
| Depressive disorder | C0011581 | ASMT | 438 | P46597 | acetylserotonin O-methyltransferase |
| Depressive disorder | C0011581 | ATF3 | 467 | P18847 | activating transcription factor 3 |
| Depressive disorder | C0011581 | NTS | 4922 | P30990 | neurotensin |
| Depressive disorder | C0011581 | OAS2 | 4939 | P29728 | 2'-5'-oligoadenylate synthetase 2 |
| Depressive disorder | C0011581 | OXT | 5020 | P01178 | oxytocin/neurophysin I prepropeptide |
| Depressive disorder | C0011581 | PDE4D | 5144 | Q08499 | phosphodiesterase 4D |
| Depressive disorder | C0011581 | PEX5L | 51555 | Q8IYB4 | peroxisomal biogenesis factor 5 like |
| Depressive disorder | C0011581 | GHRL | 51738 | Q9UBU3 | ghrelin and obestatin prepropeptide |
| Depressive disorder | C0011581 | PLA2G2A | 5320 | P14555 | phospholipase A2 group IIA |
| Depressive disorder | C0011581 | PNOC | 5368 | Q13519 | prepronociceptin |
| Depressive disorder | C0011581 | SLCO1C1 | 53919 | Q9NYB5 | solute carrier organic anion transporter family member 1C1 |
| Depressive disorder | C0011581 | DGCR8 | 54487 | Q8WYQ5 | DGCR8 microprocessor complex subunit |
| Depressive disorder | C0011581 | SLC29A3 | 55315 | Q9BZD2 | solute carrier family 29 member 3 |
| Depressive disorder | C0011581 | MAPK8 | 5599 | P45983 | mitogen-activated protein kinase 8 |
| Depressive disorder | C0011581 | MAP2K5 | 5607 | Q13163 | mitogen-activated protein kinase kinase 5 |
| Depressive disorder | C0011581 | PYY | 5697 | P10082 | peptide YY |
| Depressive disorder | C0011581 | RGS1 | 5996 | Q08116 | regulator of G protein signaling 1 |
| Depressive disorder | C0011581 | RNF123 | 63891 | Q5XPI4 | ring finger protein 123 |
| Depressive disorder | C0011581 | SYN1 | 6853 | P17600 | synapsin I |
| Depressive disorder | C0011581 | TLE1 | 7088 | Q04724 | TLE family member 1, transcriptional corepressor |
| Depressive disorder | C0011581 | CALM2 | 805 | P0DP23;P0DP24;P0DP25 | calmodulin 2 |
| Depressive disorder | C0011581 | PPP1R1B | 84152 | Q9UD71 | protein phosphatase 1 regulatory inhibitor subunit 1B |
| Depressive disorder | C0011581 | DIXDC1 | 85458 | Q155Q3 | DIX domain containing 1 |
| Depressive disorder | C0011581 | HTR3B | 9177 | O95264 | 5-hydroxytryptamine receptor 3B |
| Depressive disorder | C0011581 | LGI1 | 9211 | O95970 | leucine rich glioma inactivated 1 |
| Depressive disorder | C0011581 | HDAC5 | 10014 | Q9UQL6 | histone deacetylase 5 |
| Depressive disorder | C0011581 | HPSE | 10855 | Q9Y251 | heparanase |
| Depressive disorder | C0011581 | STIP1 | 10963 | P31948 | stress induced phosphoprotein 1 |
| Depressive disorder | C0011581 | CHRNA2 | 1135 | Q15822 | cholinergic receptor nicotinic alpha 2 subunit |
| Depressive disorder | C0011581 | CHRNB3 | 1142 | Q05901 | cholinergic receptor nicotinic beta 3 subunit |
| Depressive disorder | C0011581 | CSMD2 | 114784 | Q7Z408 | CUB and Sushi multiple domains 2 |
| Depressive disorder | C0011581 | OR7D4 | 125958 | Q8NG98 | olfactory receptor family 7 subfamily D member 4 |
| Depressive disorder | C0011581 | AANAT | 15 | Q16613 | aralkylamine N-acetyltransferase |
| Depressive disorder | C0011581 | DGKB | 1607 | Q9Y6T7 | diacylglycerol kinase beta |
| Depressive disorder | C0011581 | DRD5 | 1816 | P21918 | dopamine receptor D5 |
| Depressive disorder | C0011581 | DUSP4 | 1846 | Q13115 | dual specificity phosphatase 4 |
| Depressive disorder | C0011581 | A2M | 2 | P01023 | alpha-2-macroglobulin |
| Depressive disorder | C0011581 | FGFR2 | 2263 | P21802 | fibroblast growth factor receptor 2 |
| Depressive disorder | C0011581 | CADM1 | 23705 | Q9BY67 | cell adhesion molecule 1 |
| Depressive disorder | C0011581 | ALK | 238 | Q9UM73 | ALK receptor tyrosine kinase |
| Depressive disorder | C0011581 | FTH1 | 2495 | P02794 | ferritin heavy chain 1 |
| Depressive disorder | C0011581 | FTL | 2512 | P02792 | ferritin light chain |
| Depressive disorder | C0011581 | GABRA3 | 2556 | P34903 | gamma-aminobutyric acid type A receptor subunit alpha3 |
| Depressive disorder | C0011581 | FGF20 | 26281 | Q9NP95 | fibroblast growth factor 20 |
| Depressive disorder | C0011581 | DKK4 | 27121 | Q9UBT3 | dickkopf WNT signaling pathway inhibitor 4 |
| Depressive disorder | C0011581 | GNB1 | 2782 | P62873 | G protein subunit beta 1 |
| Depressive disorder | C0011581 | GRID1 | 2894 | Q9ULK0 | glutamate ionotropic receptor delta type subunit 1 |
| Depressive disorder | C0011581 | GRM1 | 2911 | Q13255 | glutamate metabotropic receptor 1 |
| Depressive disorder | C0011581 | GRPR | 2925 | P30550 | gastrin releasing peptide receptor |
| Depressive disorder | C0011581 | GSK3A | 2931 | P49840 | glycogen synthase kinase 3 alpha |
| Depressive disorder | C0011581 | GSTT1 | 2952 | P30711 | glutathione S-transferase theta 1 |
| Depressive disorder | C0011581 | HCRTR1 | 3061 | O43613 | hypocretin receptor 1 |
| Depressive disorder | C0011581 | IMPA2 | 3613 | O14732 | inositol monophosphatase 2 |
| Depressive disorder | C0011581 | ARRB2 | 409 | P32121 | arrestin beta 2 |
| Depressive disorder | C0011581 | ATF4 | 468 | P18848 | activating transcription factor 4 |
| Depressive disorder | C0011581 | NEFM | 4741 | P07197 | neurofilament medium |
| Depressive disorder | C0011581 | NPAS2 | 4862 | Q99743 | neuronal PAS domain protein 2 |
| Depressive disorder | C0011581 | ATP2A2 | 488 | P16615 | ATPase sarcoplasmic/endoplasmic reticulum Ca2+ transporting 2 |
| Depressive disorder | C0011581 | NPY1R | 4886 | P25929 | neuropeptide Y receptor Y1 |
| Depressive disorder | C0011581 | PENK | 5179 | P01210 | proenkephalin |
| Depressive disorder | C0011581 | PITX3 | 5309 | O75364 | paired like homeodomain 3 |
| Depressive disorder | C0011581 | FEV | 54738 | Q99581 | FEV transcription factor, ETS family member |
| Depressive disorder | C0011581 | PPP3CC | 5533 | P48454 | protein phosphatase 3 catalytic subunit gamma |
| Depressive disorder | C0011581 | PRKCI | 5584 | P41743 | protein kinase C iota |
| Depressive disorder | C0011581 | BAG1 | 573 | Q99933 | BAG cochaperone 1 |
| Depressive disorder | C0011581 | SELP | 6403 | P16109 | selectin P |
| Depressive disorder | C0011581 | SFRP1 | 6422 | Q8N474 | secreted frizzled related protein 1 |
| Depressive disorder | C0011581 | SLC1A1 | 6505 | P43005 | solute carrier family 1 member 1 |
| Depressive disorder | C0011581 | SLC6A1 | 6529 | P30531 | solute carrier family 6 member 1 |
| Depressive disorder | C0011581 | SRD5A1 | 6715 | P18405 | steroid 5 alpha-reductase 1 |
| Depressive disorder | C0011581 | TG | 7038 | P01266 | thyroglobulin |
| Depressive disorder | C0011581 | ALG8 | 79053 | Q9BVK2 | ALG8 alpha-1,3-glucosyltransferase |
| Depressive disorder | C0011581 | SERPINA6 | 866 | P08185 | serpin family A member 6 |
| Depressive disorder | C0011581 | CHRNA6 | 8973 | Q15825 | cholinergic receptor nicotinic alpha 6 subunit |
| Depressive disorder | C0011581 | HSPB3 | 8988 | Q12988 | heat shock protein family B (small) member 3 |
| Depressive disorder | C0011581 | TBX19 | 9095 | O60806 | T-box transcription factor 19 |
| Depressive disorder | C0011581 | ARHGEF10 | 9639 | O15013 | Rho guanine nucleotide exchange factor 10 |

**Table S6. Results of NF-κB signaling pathway enrichment analysis**

| **Term** | **Count** | ***P* Value** | **Genes** | **List Total** | **Pop Hits** | **Pop Total** | **Fold Enrichment** | **Bonferroni** | **Benjamini** | **FDR** |
| --- | --- | --- | --- | --- | --- | --- | --- | --- | --- | --- |
| hsa04064:NF-kappa B signaling pathway | 10 | 1.38E-07 | VCAM1, CXCL8, PARP1, PLAU, PRKCB, IL1B, BCL2, PTGS2, CXCL2, ICAM1 | 70 | 104 | 8465 | 11.62774725 | 3.21E-05 | 1.89E-06 | 9.19E-07 |

**Note:** Data are from pathway enrichment analysis (DAVID).

Count: Number of genes from our list in the pathway.

*P* Value: Uncorrected p-value for enrichment significance.

**Table S7.** **Molecular docking binding affinities**

| **receptor** | **ligand** | **affinity** |
| --- | --- | --- |
| CCL2_7so0 | arachidonate | -4 |
| CCL2_7so0 | beta-sitosterol | -6.5 |
| CCL2_7so0 | fluoxetine | -5.7 |
| CCL2_7so0 | Marckine | -6.8 |
| CCL2_7so0 | Quercetin | -7.3 |
| CCL2_7so0 | Suchilactone | -7.8 |
| CCL2_7so0 | Yangambin | -6.6 |
| CCND1_2w96 | arachidonate | -6 |
| CCND1_2w96 | beta-sitosterol | -6.7 |
| CCND1_2w96 | fluoxetine | -7.2 |
| CCND1_2w96 | Marckine | -8.1 |
| CCND1_2w96 | Quercetin | -9.2 |
| CCND1_2w96 | Suchilactone | -9.7 |
| CCND1_2w96 | Yangambin | -7.2 |
| CRP_3pvn | arachidonate | -6.1 |
| CRP_3pvn | beta-sitosterol | -6.3 |
| CRP_3pvn | fluoxetine | -6.7 |
| CRP_3pvn | Marckine | -7.7 |
| CRP_3pvn | Quercetin | -9.4 |
| CRP_3pvn | Suchilactone | -7.7 |
| CRP_3pvn | Yangambin | -7.6 |
| CXCL2_5ob5 | arachidonate | -3.1 |
| CXCL2_5ob5 | beta-sitosterol | -5 |
| CXCL2_5ob5 | fluoxetine | -4.6 |
| CXCL2_5ob5 | Marckine | -5 |
| CXCL2_5ob5 | Quercetin | -5.7 |
| CXCL2_5ob5 | Suchilactone | -6 |
| CXCL2_5ob5 | Yangambin | -4.7 |
| CXCL8_5wdz | arachidonate | -4.1 |
| CXCL8_5wdz | beta-sitosterol | -5.8 |
| CXCL8_5wdz | fluoxetine | -5.9 |
| CXCL8_5wdz | Marckine | -6.6 |
| CXCL8_5wdz | Quercetin | -6.4 |
| CXCL8_5wdz | Suchilactone | -6.4 |
| CXCL8_5wdz | Yangambin | -5.3 |
| EGF_1nql | arachidonate | -4.2 |
| EGF_1nql | beta-sitosterol | -7.3 |
| EGF_1nql | fluoxetine | -6.4 |
| EGF_1nql | Marckine | -7.8 |
| EGF_1nql | Quercetin | -7.2 |
| EGF_1nql | Suchilactone | -7.3 |
| EGF_1nql | Yangambin | -6.6 |
| FOS_1a02 | arachidonate | -4.3 |
| FOS_1a02 | beta-sitosterol | -7 |
| FOS_1a02 | fluoxetine | -6.1 |
| FOS_1a02 | Marckine | -8.6 |
| FOS_1a02 | Quercetin | -8.3 |
| FOS_1a02 | Suchilactone | -9 |
| FOS_1a02 | Yangambin | -8 |
| HIF1A_1lm8 | arachidonate | -4.9 |
| HIF1A_1lm8 | beta-sitosterol | -6.9 |
| HIF1A_1lm8 | fluoxetine | -6.4 |
| HIF1A_1lm8 | Marckine | -7.6 |
| HIF1A_1lm8 | Quercetin | -7.5 |
| HIF1A_1lm8 | Suchilactone | -7.2 |
| HIF1A_1lm8 | Yangambin | -6.7 |
| ICAM1_1iam | arachidonate | -4.1 |
| ICAM1_1iam | beta-sitosterol | -5.2 |
| ICAM1_1iam | fluoxetine | -4.8 |
| ICAM1_1iam | Marckine | -7 |
| ICAM1_1iam | Quercetin | -5.6 |
| ICAM1_1iam | Suchilactone | -6.3 |
| ICAM1_1iam | Yangambin | -5 |
| IFNG_1fyh | arachidonate | -5 |
| IFNG_1fyh | beta-sitosterol | -8 |
| IFNG_1fyh | fluoxetine | -6.7 |
| IFNG_1fyh | Marckine | -8.3 |
| IFNG_1fyh | Quercetin | -8 |
| IFNG_1fyh | Suchilactone | -7.7 |
| IFNG_1fyh | Yangambin | -7.2 |
| IL10_2ilk | arachidonate | -5.2 |
| IL10_2ilk | beta-sitosterol | -7.9 |
| IL10_2ilk | fluoxetine | -7 |
| IL10_2ilk | Marckine | -8.3 |
| IL10_2ilk | Quercetin | -6.7 |
| IL10_2ilk | Suchilactone | -7.9 |
| IL10_2ilk | Yangambin | -6.9 |
| IL1A_2kki | arachidonate | -4.8 |
| IL1A_2kki | beta-sitosterol | -6.3 |
| IL1A_2kki | fluoxetine | -6.4 |
| IL1A_2kki | Marckine | -7.5 |
| IL1A_2kki | Quercetin | -6.6 |
| IL1A_2kki | Suchilactone | -7 |
| IL1A_2kki | Yangambin | -5.5 |
| IL1B_5r8q | arachidonate | -5.4 |
| IL1B_5r8q | beta-sitosterol | -6.9 |
| IL1B_5r8q | fluoxetine | -6.7 |
| IL1B_5r8q | Marckine | -7.7 |
| IL1B_5r8q | Quercetin | -6.8 |
| IL1B_5r8q | Suchilactone | -6.9 |
| IL1B_5r8q | Yangambin | -6 |
| IL2_7m2g | arachidonate | -4.5 |
| IL2_7m2g | beta-sitosterol | -5.4 |
| IL2_7m2g | fluoxetine | -5.2 |
| IL2_7m2g | Marckine | -5.6 |
| IL2_7m2g | Quercetin | -5.8 |
| IL2_7m2g | Suchilactone | -5.6 |
| IL2_7m2g | Yangambin | -3.6 |
| IL6_1alu | arachidonate | -4.7 |
| IL6_1alu | beta-sitosterol | -5.1 |
| IL6_1alu | fluoxetine | -5.7 |
| IL6_1alu | Marckine | -5.8 |
| IL6_1alu | Quercetin | -6.6 |
| IL6_1alu | Suchilactone | -6.5 |
| IL6_1alu | Yangambin | -4.2 |
| MAPK1_2y9q | arachidonate | -6.4 |
| MAPK1_2y9q | beta-sitosterol | -7.9 |
| MAPK1_2y9q | fluoxetine | -7.8 |
| MAPK1_2y9q | Marckine | -8.9 |
| MAPK1_2y9q | Quercetin | -9.1 |
| MAPK1_2y9q | Suchilactone | -9.3 |
| MAPK1_2y9q | Yangambin | -8.2 |
| MMP2_3ayu | arachidonate | -4.9 |
| MMP2_3ayu | beta-sitosterol | -5.9 |
| MMP2_3ayu | fluoxetine | -6.9 |
| MMP2_3ayu | Marckine | -6.4 |
| MMP2_3ayu | Quercetin | -7.7 |
| MMP2_3ayu | Suchilactone | -6.4 |
| MMP2_3ayu | Yangambin | -5.7 |
| MMP9_4xct | arachidonate | -5.1 |
| MMP9_4xct | beta-sitosterol | -8.1 |
| MMP9_4xct | fluoxetine | -9.1 |
| MMP9_4xct | Marckine | -11.4 |
| MMP9_4xct | Quercetin | -10.9 |
| MMP9_4xct | Suchilactone | -10.6 |
| MMP9_4xct | Yangambin | -7.4 |
| MPO_5mfa | arachidonate | -5 |
| MPO_5mfa | beta-sitosterol | -7.9 |
| MPO_5mfa | fluoxetine | -7.9 |
| MPO_5mfa | Marckine | -9.1 |
| MPO_5mfa | Quercetin | -9.8 |
| MPO_5mfa | Suchilactone | -9.4 |
| MPO_5mfa | Yangambin | -8.4 |
| PPARG_6ms7 | arachidonate | -6.2 |
| PPARG_6ms7 | beta-sitosterol | -9.7 |
| PPARG_6ms7 | fluoxetine | -7.6 |
| PPARG_6ms7 | Marckine | -9.9 |
| PPARG_6ms7 | Quercetin | -8.6 |
| PPARG_6ms7 | Suchilactone | -9.2 |
| PPARG_6ms7 | Yangambin | -8.4 |
| PTGS2_5f19 | arachidonate | -5.2 |
| PTGS2_5f19 | beta-sitosterol | -7.3 |
| PTGS2_5f19 | fluoxetine | -8.5 |
| PTGS2_5f19 | Marckine | -8.9 |
| PTGS2_5f19 | Quercetin | -9.8 |
| PTGS2_5f19 | Suchilactone | -9.9 |
| PTGS2_5f19 | Yangambin | -7.2 |
| SERPINE1_7aqf | arachidonate | -4.5 |
| SERPINE1_7aqf | beta-sitosterol | -6.3 |
| SERPINE1_7aqf | fluoxetine | -5.7 |
| SERPINE1_7aqf | Marckine | -7.6 |
| SERPINE1_7aqf | Quercetin | -7 |
| SERPINE1_7aqf | Suchilactone | -7 |
| SERPINE1_7aqf | Yangambin | -5.5 |
| STAT1_7nuf | arachidonate | -4.1 |
| STAT1_7nuf | beta-sitosterol | -6.4 |
| STAT1_7nuf | fluoxetine | -5.8 |
| STAT1_7nuf | Marckine | -7.3 |
| STAT1_7nuf | Quercetin | -6.1 |
| STAT1_7nuf | Suchilactone | -6.6 |
| STAT1_7nuf | Yangambin | -5.4 |
| TGFB1_5vqp | arachidonate | -4.1 |
| TGFB1_5vqp | beta-sitosterol | -5.2 |
| TGFB1_5vqp | fluoxetine | -5.1 |
| TGFB1_5vqp | Marckine | -7.2 |
| TGFB1_5vqp | Quercetin | -6.5 |
| TGFB1_5vqp | Suchilactone | -6.1 |
| TGFB1_5vqp | Yangambin | -4.7 |
| VCAM1_1vca | arachidonate | -3.8 |
| VCAM1_1vca | beta-sitosterol | -6.2 |
| VCAM1_1vca | fluoxetine | -5.5 |
| VCAM1_1vca | Marckine | -6.8 |
| VCAM1_1vca | Quercetin | -6.6 |
| VCAM1_1vca | Suchilactone | -7.1 |
| VCAM1_1vca | Yangambin | -5.3 |
